# Supplementary figures and images for: Trace gas and particle emissions from domestic and industrial biofuel use and garbage burning in central Mexico
Source: Copernicus journal article supplement (doi:10.5194/acp-10-565-2010), 2010-01-21

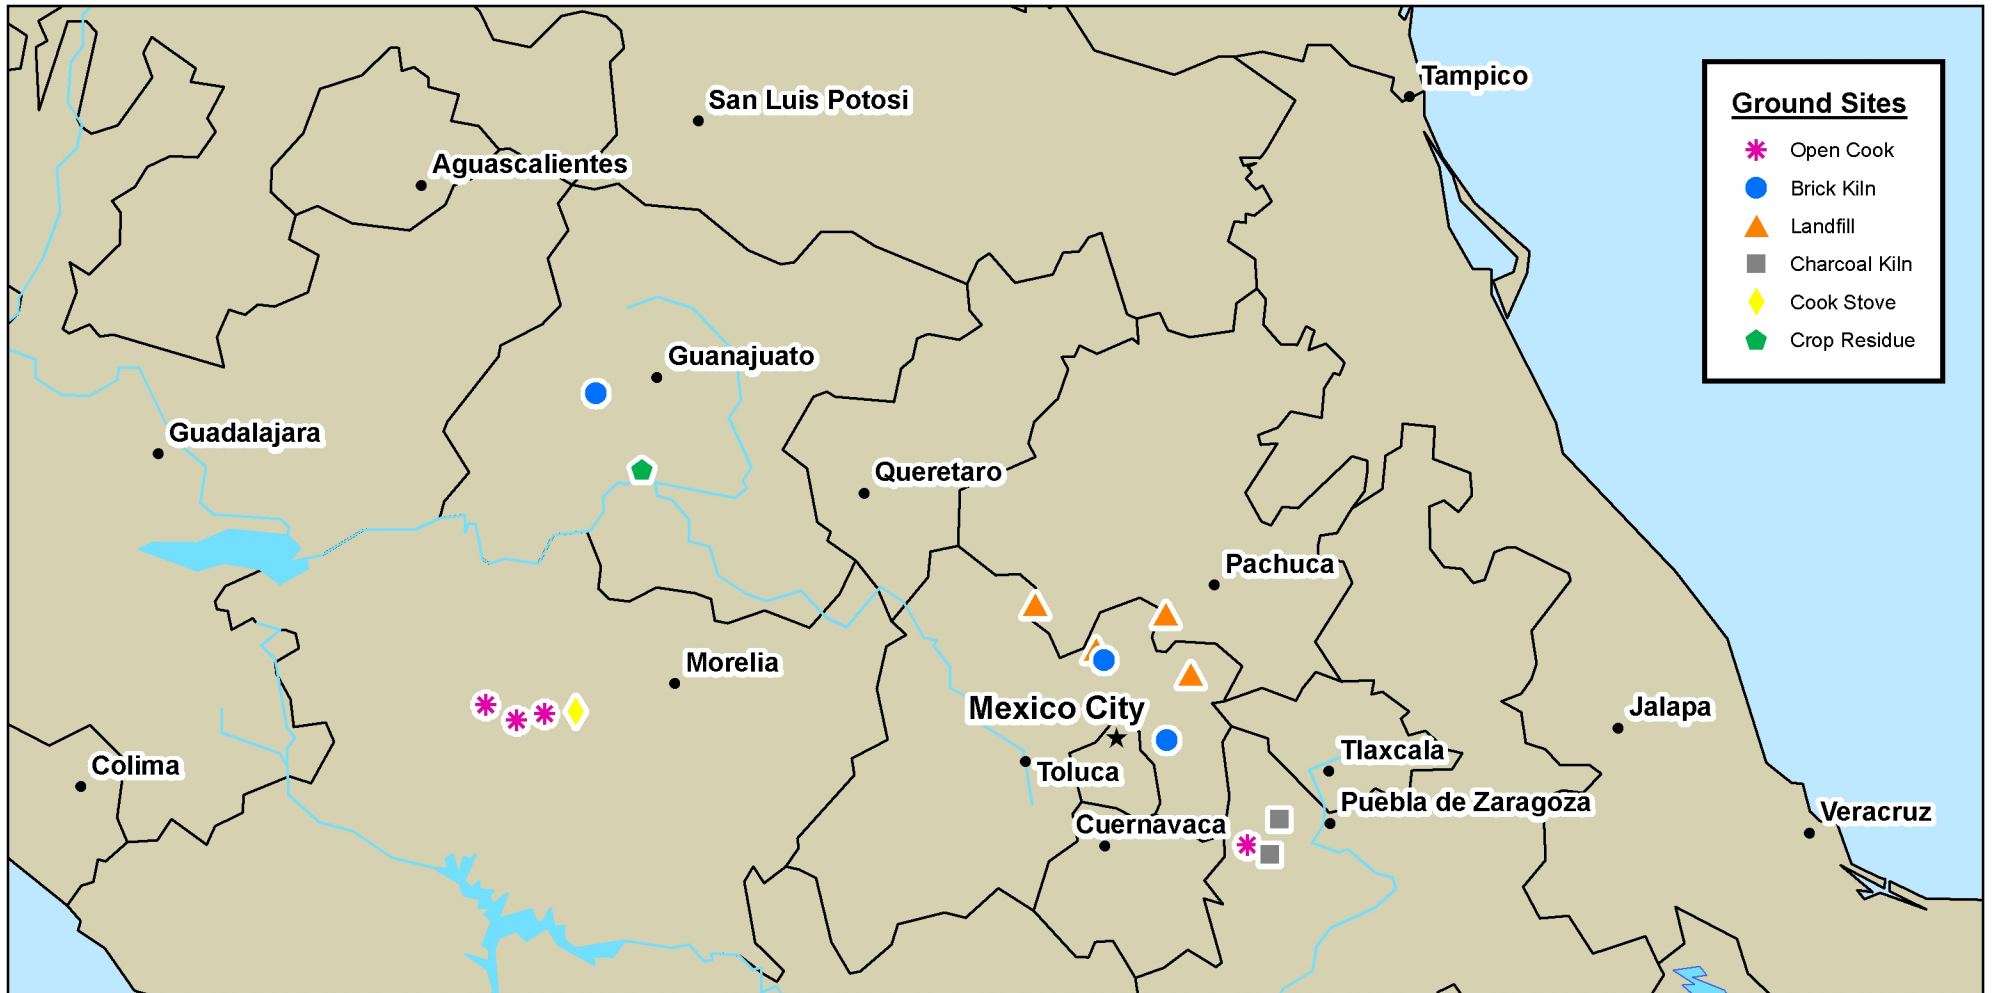

Supplement: Supplementary file 2 [file acp-10-565-2010-supplement.pdf]
